1 **Comprehensive Characterization of Toxicity of Fermentative Metabolites on**  
2 **Microbial Growth**

3 Brandon Wilbanks<sup>1</sup> and Cong T. Trinh<sup>1,2,\*</sup>

4 <sup>1</sup>Department of Chemical and Biomolecular Engineering, University of Tennessee, Knoxville,  
5 TN 37920

6 <sup>2</sup>Bioenergy Science Center (BESC), Oak Ridge National Laboratory, Oak Ridge

7 \*Corresponding author:

8 Cong T. Trinh

9 Dept of Chemical and Biomolecular Engineering

10 University of Tennessee, Knoxville

11 1512 Middle Dr., DO#432

12 Knoxville, TN 37996

13 [ctrinh@utk.edu](mailto:ctrinh@utk.edu)

14

15 Additional Contact Information:

16 Brandon Wilbanks: [brandonawilbanks@gmail.com](mailto:brandonawilbanks@gmail.com)

17

18

## 19 ABSTRACT

20 **Background.** Volatile carboxylic acids, alcohols, and esters are natural fermentative products,  
21 typically derived from anaerobic digestion. These metabolites have important functional roles to  
22 regulate cellular metabolisms and broad use as food supplements, flavors and fragrances,  
23 solvents, and fuels. Comprehensive characterization of toxic effects of these metabolites on  
24 microbial growth under similar conditions is very limited.

25 **Results.** We characterized a comprehensive list of 32 short-chain carboxylic acids, alcohols, and  
26 esters on microbial growth of *Escherichia coli* MG1655 under anaerobic conditions. We  
27 analyzed toxic effects of these metabolites on *E. coli* health, quantified by growth rate and cell  
28 mass, as a function of metabolite types, concentrations, and physiochemical properties including  
29 carbon chain lengths and associated functional groups, chain branching features, hydrophobicity,  
30 and energy density. Strain characterization reveals these metabolites exerted distinct toxic  
31 effects on *E. coli* health. We find that higher concentrations and/or longer carbon lengths of  
32 metabolites cause more severe growth inhibition. For the same carbon lengths and metabolite  
33 concentrations, alcohols are most toxic followed by acids then esters. We also discover that  
34 branched chain metabolites are less toxic than linear chain metabolites for the same carbon  
35 lengths and metabolite concentrations. Remarkably, shorter alkyl esters (e.g., ethyl butyrate) are  
36 found to be less toxic than longer alkyl esters (e.g., butyl acetate) for the same carbon lengths  
37 and metabolite concentrations. Regardless of metabolite types, longer chain metabolites are less  
38 soluble and have higher energy densities but are more toxic to microbial growth.

39 **Conclusions.** Metabolite hydrophobicity, correlated with carbon chain length, associated  
40 functional group, chain branching feature, and energy density, is a good quantitative index to  
41 evaluate toxic effect of a metabolite on microbial health. The results provide better

42 understanding of degrees of toxicity of fermentative metabolites on microbial growth and further  
43 help selection of desirable metabolites and hosts for industrial fermentation to overproduce them.

44

45 **Key words:** *Escherichia coli*, toxicity; alcohols; carboxylic acids; esters; growth inhibition;  
46 energy density; partition coefficient; hydrophobicity

47

## 48 **BACKGROUND**

49           During anaerobic digestion of organic matters, organisms naturally produce volatile  
50 organic acids and alcohols to balance cellular redox states. These molecules, along with esters  
51 generated from condensation of alcohols and acids, are of particular interest for not only  
52 fundamentally studying their functional roles to regulate cellular metabolisms and microbiomes  
53 [1] but also harnessing them as food supplements, natural flavors and fragrances, solvents, and  
54 fuels [2].

55           A diverse class of microbes can naturally produce these volatile metabolites, and some  
56 being harnessed for industrial-scale production. For instance, *Escherichia coli*, a facultative,  
57 gram-negative bacterium found in lower intestine of animals, is widely used as an industrial  
58 workhorse microorganism for biocatalysis. *E. coli* possesses a native mixed acid fermentative  
59 metabolism that has been metabolically engineered to produce many of fermentative metabolites  
60 including alcohols (e.g., ethanol [3, 4], isopropanol [5], butanol [6], isobutanol [7], pentanol [8],  
61 and hexanol [9]), diols (e.g., 1,3-propanediol [10], and 1,4-butanediol [11]), acids (e.g., pyruvate  
62 [12], lactate [13], and short-medium chain carboxylic acids [14]), diacids (e.g., succinate [15],  
63 adipate [16]), and esters (e.g., acetate esters [17], propionate esters [18, 19], butyrate esters [18-  
64 20], pentanoate esters [18, 19], and hexanoate esters [18, 19]).

65           Fermentative metabolites, however, can become inhibitory to microbial growth by  
66 directly interfering with cell membrane and/or intracellular processes [21-29]. Currently, data on  
67 toxic effects of a comprehensive set of fermentative metabolites on microbial growth under  
68 similar growth conditions is very limited. Availability of this data can help identify and better  
69 understand most toxic metabolites to microbes during fermentation. It also provides design  
70 criteria for selecting desirable metabolites and microbes for industrial production as well as

71 effective engineering strategies to alleviate toxicity. For instance, various strategies of targeted  
72 engineering have been implemented to enhance microbial tolerance against some fermentative  
73 metabolites including increasing the ratio of saturated and unsaturated fatty acid compositions  
74 [30], raising the average chain length of fatty acid moieties in cell membrane [31], enhancing  
75 the ratio of trans- and cis-unsaturated fatty acids of cell membrane [32], and expressing efflux  
76 pumps [33] or chaperones [34]. Genome and evolutionary engineering have also been explored  
77 to enhance tolerance [24, 35-37].

78 In this study, we characterized toxic effects of a comprehensive set of 32 fermentative  
79 metabolites including 8 carboxylic acids, 8 alcohols, and 16 esters on *E. coli* health. We analyzed  
80 toxic effects of these metabolites as a function of metabolite types, concentrations, and  
81 physiochemical properties including carbon chain lengths and associated functional groups,  
82 chain branching features, hydrophobicity, and energy density.

83

## 84 **RESULTS AND DISCUSSION**

85 To study toxic effects of fermentative metabolites on *E. coli* health, growth kinetics were  
86 generated for each metabolite using standard concentrations (0, 2.5, 5.0, and 7.5 g/L) and  
87 additional concentrations as needed for certain metabolites. Both maximum growth rate and  
88 optical density (OD) during the first 24 h period were extracted to evaluate *E. coli* health. For the  
89 reference growth condition without supplementation of a toxic chemical, wildtype *E. coli*  
90 MG1655 grew at a rate of  $0.6134 \pm 0.0337$  1/h and OD of  $1.3982 \pm 0.0554$  (Figure 1).

91

### 92 **Toxic effects of alcohols**

93           The first alcohol of interest, ethanol, was found to be essentially non-toxic up to 7.5 g/L  
94 (Figure 1A). At 10 g/L ethanol, specific growth rate and OD decreased by only 12% and 25%  
95 each as compared to the reference (without supplementation of the toxin) (Figure 2). At the  
96 highest measured concentration of 15 g/L, growth rate was further reduced by only 18%, but OD  
97 was nearly 40% lower at  $0.8240 \pm 0.0130$ .

98           Propanol toxicity at concentrations up to 7.5 g/L was similar to that of ethanol, but at 15  
99 g/L it was significantly more toxic (Figure 1B). Specific growth rate was  $0.3955 \pm 0.0278$  1/h  
100 (nearly 50% lower than the reference) and OD was  $0.5337 \pm 0.0271$  (~60% lower than the  
101 reference) (Figure 2). Isopropanol toxicity exhibited relatively similar trends like propanol  
102 toxicity but with slightly higher growth rate and OD at most concentrations tested (Figures 1C,  
103 2).

104           Butanol is the first alcohol to display strong toxic effects before 10 g/L (Figure 1D). At  
105 7.5 g/L, growth rate ( $0.2932 \pm 0.0302$  1/h) and OD ( $0.5927 \pm 0.0454$ ) were reduced more than  
106 50% as compared to the reference (Figure 2). Growth was entirely inhibited in butanol at 15 g/L.  
107 Our data presented for butanol toxicity is consistent with a previous study reporting that growth  
108 of *E. coli* DH5 $\alpha$  in YPD medium was reduced by 80% in 1% v/v (~8.1 g/L) butanol and stopped  
109 at 2% v/v (~16.2 g/L) [38]. Isobutanol was less toxic than butanol at all concentrations, with the  
110 exception of 15 g/L, where no growth was observed for both compounds (Figure 1E). At 7.5 g/L,  
111 isobutanol was less inhibitory than butanol for *E. coli* growth, with higher specific growth rate  
112 and OD by approximately 25% (Figure 2). Findings of isobutanol toxicity presented here are  
113 consistent with the Atsumi *et al.*'s report [24]. The difference in toxic effects of isobutanol and  
114 butanol is consistent with the data by the Huffer *et al.* report [25]. Remarkably, based on the

115 Huffer *et al.*'s data, microbial health is less inhibited in isobutanol than butanol for not only *E.*  
116 *coli* but also some other bacterial, eukaryotic, archaeal species.

117 For pentanol and isopentanol, no growth was observed at any studied concentrations  
118 above 5 g/L (Figures 1F, 1G). Pentanol terminated all growth at 5g/L, and at 3.75 g/L specific  
119 growth rate was just  $0.2818 \pm 0.0438$  1/h (Figures 1F, 2). Unlike pentanol, isopentanol at 5 g/L  
120 allowed for growth, with a significantly reduced specific growth rate of  $0.2017 \pm 0.0388$  1/h and a  
121 OD of  $0.2703 \pm 0.0241$  (Figures 1G, 2). At 2.5 g/L, isopentanol suppressed specific growth rate  
122 and OD by 12% and 8% less than did pentanol.

123 Hexanol is the most toxic among alcohols used in this study. It eliminated all growth at  
124 only 2.5 g/L. A far reduced concentration of 0.625 g/L still cut specific growth rate by over 45%  
125 and OD by nearly 60% as compared to the reference (Figures 1H, 2).

126 Overall, alcohols are toxic to microbial growth, and degrees of toxicity depend on alcohol  
127 types and concentrations. Increasing alcohol concentrations decrease both specific growth rate  
128 and OD. Shorter chain length alcohols (ethanol, propanol, isopropanol) require higher  
129 concentrations in order to impact growth significantly.

130

### 131 **Toxic effects of carboxylic acids**

132 Acetic acid was marginally toxic up to 7.5 g/L, at which specific growth rate ( $0.4392 \pm$   
133  $0.0320$  1/h) and OD ( $0.9050 \pm 0.0131$ ) were each reduced by ~20% compared to the reference  
134 (Figures 3A, 4). Propionic acid at an identical concentration was found to be much more toxic  
135 than acetic acid, with specific growth rate ( $0.2374 \pm 0.0253$  1/h) and OD ( $0.3542 \pm 0.0142$ )  
136 decreased ~60% and ~75%, respectively (Figures 3B, 4).

137 Butanoic acid at 7.5 g/L was seen to be slightly more inhibitive of specific growth rate  
138 and OD than propionic acid whereas concentrations of 2.5 g/L and 5 g/L appeared similarly toxic  
139 like propionic acid (Figures 3C, 4). Isobutanoic acid was found to be less toxic than butanoic  
140 acid, following the chain branching trend seen in alcohols (Figures 3D, 4). At 2.5, 5.0, and 7.5  
141 g/L, cells grew 6%, 5%, and 15% faster in isobutanoic acid than butanoic acid.

142 The pair of pentanoic and isopentanoic acid was also used. At each concentration,  
143 isopentanoic was less toxic than pentanoic acid. Pentanoic and isopentanoic acids sustained  
144 growth at 7.5 g/L to ODs of  $0.3017 \pm 0.0504$  and  $0.3417 \pm 0.0213$ , respectively, and specific  
145 growth rates reached  $0.2262 \pm 0.0395$  and  $0.3041 \pm 0.0170$  1/h, respectively (Figures 3E, 3F, 4).

146 The next acid studied was hexanoic acid. Growth with this compound was sustained at  
147 7.5 g/L, but specific growth rate was reduced by  $\approx 70\%$  and OD just reached  $0.2448 \pm 0.0283$   
148 (Figures 3G, 4). Octanoic acid was even more toxic, eliminating all growth at 5 g/L (Figure 3H,  
149 4). At 2.5 g/L, specific growth rate ( $0.3741 \pm 0.0598$  1/h) and OD ( $0.4328 \pm 0.0219$ ) was  
150 decreased by about 40% and 65% as compared to the reference, respectively. Octanoic acid is  
151 the most toxic organic acid studied here, and the only acid that prevented all growth above 2.5  
152 g/L.

153 Like alcohols, acid toxicity on microbial growth depends on exposed concentrations and  
154 acid types. Increasing acid concentrations enhances toxicity for all compounds, reducing growth  
155 rates and cell concentrations. Longer chain acids cause more severe growth inhibition

156

### 157 **Toxic effects of esters**

158 Cells can produce a combinatorial library of esters by condensing organic acids and  
159 alcohols [18-20]. In this study, we investigated the toxic effects of a comprehensive list of 16



160 common short-chain esters on *E. coli* health. For comparison, we classified these esters into 3  
161 categories: ethyl esters, propyl esters, and butyl esters.

162 ***Ethyl esters.*** Ethyl acetate was not strongly toxic until concentrations of 10 g/L or greater  
163 (Figure 5A). At 10 and 15 g/L, specific growth rates observed were reduced to  $0.4246 \pm 0.0089$   
164 1/h and  $0.2664 \pm 0.0073$  1/h, respectively. OD followed similar trends, being reduced to  $0.8677 \pm$   
165  $0.0311$  at 10 g/L and  $0.3490 \pm 0.0255$  at 15 g/L (Figure 6). Ethyl propionate was more toxic than  
166 ethyl acetate at identical concentrations (Figure 5B). At 10 g/L, specific growth rates between  
167 growth in ethyl acetate and ethyl propionate were not significantly different, but OD was more  
168 than 20% lower in ethyl propionate than in ethyl acetate (Figure 6). No growth occurred with the  
169 addition of 15 g/L ethyl propionate, making ethyl acetate the only ester that allowed for any  
170 growth at 15 g/L (Figure 5).

171 Ethyl butyrate was the most toxic among the characterized ethyl esters, with a specific  
172 growth rate of  $0.3592 \pm 0.0050$  1/h and OD of  $0.5437 \pm 0.0151$  at 5 g/L (Figures 5C, 6). The  
173 toxic effect of ethyl butyrate was still noteworthy at 5 g/L, slowing growth rate by over 25% and  
174 lowering OD by over 40% as compared to the reference. The branched chain isomer of ethyl  
175 butyrate, ethyl isobutyrate, was also studied (Figure 5D). It was less toxic than ethyl butyrate at  
176 all concentrations, most notably at 5 g/L, where observed growth rate was approximately 20%  
177 higher than the growth rate with ethyl butyrate (Figure 6). Cultures with 7.5 g/L of both ethyl  
178 butyrate and ethyl isobutyrate were unable to grow (Figures 5C, 5D).

179 ***Propyl esters.*** Both propyl acetate and isopropyl acetate inhibited growth at 7.5 g/L, but  
180 isopropyl acetate was far less toxic (Figures 5E, 5H). Cultures containing propyl acetate at 7.5  
181 g/L reached an OD of  $0.2372 \pm 0.0241$ , doubling only once in 24 h of characterization. However,  
182 the cell culture with isopropyl acetate at 7.5 g/L displayed a higher OD than the cell culture with

183 propyl acetate by 3 folds (Figure 6). Cells ( $0.3749 \pm 0.0148$  1/h) also grew 3.5 times faster in  
184 isopropyl acetate than propyl acetate at this concentration.

185 The addition of propyl propionate at any concentration 5 g/L or higher prevented all  
186 growth (Figure 5F). A strong toxic effect was seen at the addition of 2.5 g/L of the compound,  
187 reducing both specific growth rate ( $0.4689 \pm 0.0234$  1/h) and OD ( $0.7962 \pm 0.0168$ ) by ~25%  
188 and ~40% as compared to the reference, respectively (Figure 6). On the other hand, cultures  
189 exposed to 2.5 g/L isopropyl propionate displayed much healthier growth (Figures 5I, 6), with a  
190 specific growth rate of  $0.5332 \pm 0.0329$  (1/h) and OD of  $0.9837 \pm 0.0209$ . Like propyl  
191 propionate, no growth occurred in cultures at 5 g/L isopropyl propionate.

192 The final pair of propyl esters characterized here is propyl butyrate and isopropyl  
193 butyrate. Both compounds prevented any growth from occurring at 2 g/L, but growth was  
194 sustained at concentrations of 1.25 g/L or lower (Figures 5G, 5J). Propyl butyrate at 1.25 g/L  
195 decreased specific growth rate ( $0.3527 \pm 0.0077$  1/h) and OD ( $0.5670 \pm 0.0277$ ) about 2 folds.  
196 Isopropyl butyrate was less toxic, with 7% higher growth rate and 15% higher OD than propyl  
197 butyrate at this concentration (Figure 6).

198 **Butyl esters.** The addition of butyl acetate reduced both specific growth rate and OD by  
199 half at a concentration of 2.5 g/L (Figures 5K, 6) while all previously discussed acetate esters  
200 (ethyl acetate, propyl acetate, isopropyl acetate) showed no toxic effects at 2.5 g/L or less. No  
201 growth was observed at any concentrations of butyl acetate higher than 4 g/L. Isobutyl acetate  
202 was less toxic than butyl acetate where cells ( $0.4194 \pm 0.0294$  1/h) grew 15% faster at 2.5 g/L  
203 and displayed a 3% increase in OD ( $0.6847 \pm 0.0341$  1/h) (Figures 5N, 6). Like butyl acetate,  
204 cells exposed to isobutyl acetate at concentrations higher than 4 g/L failed to grow.

205 Butyl propionate is far more toxic than butyl acetate (Figures 5L, 6). Unlike butyl and  
206 isobutyl acetates, butyl propionate with concentration greater than 2 g/L prevented growth.  
207 Growth at 1.25 g/L of this compound was marginal with specific growth rate decreased by more  
208 than 60%. The toxic effects were even seen at just 1 g/L, where specific growth rate ( $0.4850 \pm$   
209  $0.0207$ ) dropped by 20%. Isobutyl propionate was slightly less toxic, allowing for growth at 2  
210 g/L, but specific growth rate and OD were each no more than 20% of that of the reference  
211 (Figures 5O, 6).

212 The final esters of interest were the pair of butyl butyrate and isobutyl butyrate. Butyl  
213 butyrate was the most toxic compound in this work, prohibiting all growth at any concentrations  
214 of 1 g/L or higher (Figures 5M, 5P, 6). At just 0.75 g/L, specific growth rate was reduced to  
215  $0.3661 \pm 0.0319$  1/h (60% of the reference) and OD to  $0.4948 \pm 0.1426$  (~35% of the reference).  
216 In comparison, isobutyl butyrate limited growth by 30% less (Figure 6), displaying a specific  
217 growth rate of  $0.5337 \pm 0.0204$  (1/h) at the same concentration. OD was over 2-fold higher with  
218 this compound than with butyl butyrate. Growth at concentrations of 1 g/L of both compounds  
219 was prevented.

220 Like alcohols and acids, we observed similar trend of toxicity as a function of ester types  
221 and concentrations. Increasing ester concentrations increases toxicity for all compounds and  
222 shorter chain esters exhibit less toxic effects on microbial growth.

223 There is a strong linear correlation ( $R^2 > 0.94$ ) between growth rate and cell mass when *E.*  
224 *coli* is exposed to alcohols, acids, and esters (Supplementary Figure 1). Therefore, *E. coli* health  
225 can be evaluated based on growth rates and cell mass under all conditions investigated.

226

227 **Linking physiochemical properties of metabolites and toxic effects**

228           ***Chain length and associated functional groups.*** To compare toxic effects of metabolites  
229 within and across chemical classes, we first used the carbon chain length as a basis. Regardless  
230 of metabolite types and concentrations, carbon chain length was strongly correlated with growth  
231 inhibition, reducing both growth rate and cell mass (Figure 7). The longer the carbon length is,  
232 the more toxic a metabolite becomes.

233           Toxic effects of longer chain metabolites on microbial growth are likely caused by  
234 membrane disruption. Except esters, some acids and alcohols have been reported to disrupt  
235 membrane integrity and hence inhibit cell growth [25, 27, 39, 40]. As the total count of carbon  
236 atoms in a molecule increases, it becomes more soluble in the cell's lipid membrane and less so  
237 in aqueous media. This interference causes extensive changes to cell morphology, primarily  
238 elongation due to changes in membrane fluidity, which is a well-known indicator of high stress  
239 environments and disrupted membranes [41]. This effect of chain length has been discussed in  
240 previous literature among ionic liquids [42] and surfactants [43], but has not been observed for a  
241 comprehensive set of fermentative metabolites investigated in this work.

242           Even though the correlation between carbon chain length and toxic effect is prevalent, the  
243 strength of this correlation varies among metabolites within and across metabolite classes.  
244 Alcohol toxicity is most strongly correlated with chain length, and each alcohol is overall more  
245 toxic than a corresponding organic acid or ester of the same total carbon. The trend, however,  
246 cannot be simply explained alone by the functional role of carbon chain length but needs to take  
247 into account of associated functional groups such as the relative polarity of a hydroxyl or  
248 carboxyl group. For example, pentanol and pentanoic acid each have the same number of carbon  
249 atoms, but pentanol is less polar (1.79 D versus 2.29 D). The higher polarity of pentanoic acid  
250 makes it less membrane-soluble than pentanol at identical concentrations, and hence is less toxic

251 on microbial growth. Our data shows that cells grew faster in pentanoic acid ( $0.4016 \pm 0.0212$   
252 1/h) than in pentanol ( $0.5228 \pm 0.0519$  1/h) at 2.5 g/L and yielded higher cell mass (OD =  $0.8140$   
253  $\pm 0.0155$  in pentanoic acid versus  $0.6930 \pm 0.0362$  in pentanol). Another factor that could  
254 contribute to this difference in toxicity of alcohols and acids is stereochemistry. The larger  
255 carboxyl group on organic acids can physically hinder the acid's ability to enter the membrane,  
256 whereas the smaller hydroxyl group will present less resistance.

257 ***Chain branching.*** For the same carbon length and chemical class, chain branching can  
258 also have different toxic effects on microbial growth. Our result shows that branched-chain  
259 isomers of each metabolite is less toxic to microbial growth across all chemical classes (Figure 7  
260 and Supplementary Figures 2-4). This trend can be clearly seen when cells are exposed to C5  
261 alcohols, esters, and acids. At 2.5 g/L exposure, for instance, cells grew ~18% faster in  
262 isopentanol ( $0.4752 \pm 0.0370$  1/h) than pentanol ( $0.4016 \pm 0.0212$  1/h), 5% faster in isopentanoic  
263 acid ( $0.5560 \pm 0.0186$  1/h) than pentanoic acid ( $0.5528 \pm 0.0519$  1/h), and 10% faster in  
264 isopropyl acetate ( $0.6438 \pm 0.0357$  1/h) than propyl acetate ( $0.5849 \pm 0.0167$  1/h). For C5 acids,  
265 the trend is more significant when cells are exposed to higher concentrations. Cells grew ~30%  
266 faster in isopentanoic acid than pentanoic acid at 7.5 g/L. The reduced toxic effects of chain  
267 branching can also be explained by the impact of membrane disruption. Branched chain isomers  
268 are less membrane soluble than their corresponding straight chain isomer at any given chain  
269 length, and hence become less toxic to microbial growth.

270 ***Ester dissociation.*** Each ester is comprised of alcohol and acid moieties. Different from  
271 alcohols and acids, toxic effects of esters can be very distinct in that different esters of the same  
272 total carbon length can have significantly different degrees of toxicity. To demonstrate, we focus  
273 on the pair of ethyl butyrate and butyl acetate (both  $C_5H_{12}O_2$ ) to examine this pattern. The

274 difference between these two esters is that ethyl butyrate is comprised of ethanol and butyric acid  
275 moieties while butyl acetate is comprised of butanol and acetic acid moieties. At 2.5 g/L, cell  
276 grew ~40% slower in butyl acetate ( $0.3186 \pm 0.0207$  1/h) than in ethyl butyrate ( $0.5106 \pm 0.0168$   
277 1/h) and also yielded ~40% lower cell mass in butyl acetate than ethyl butyrate (Figures 5, 6).  
278 This same trend is consistently seen in many other ester pairs of the same total carbon count.

279 This distinct toxic effect of esters can be explained by ester dissociation. Esters can be  
280 spontaneously hydrolyzed into alcohol and carboxylic acid moieties in aqueous media. At any  
281 given time, media supplied with esters for toxicity test contain some of both associated alcohols  
282 and carboxylic acids. For esters with the same carbon length, those having longer chain alcohol  
283 moieties are more toxic than those having shorter chain alcohol moieties.

284 ***Acid dissociation.*** For high carbon chain lengths and concentrations, acids appear less  
285 toxic than esters (Figure 7). For instance, at 7.5 g/L and a total carbon of 6, cells were still able to  
286 grow in acids (hexanoic acid) but neither in alcohols (hexanol) nor esters (ethyl butyrate, butyl  
287 acetate, propyl propionate, isopropyl propionate). This phenotype can be best explained by the  
288 acid dissociation that enables it to exist as the monoprotic acid and conjugate base forms.  
289 Degrees of dissociation depend on pKa of the metabolite and pH. In our experiments, the  
290 fraction of conjugate base dominated because the initial pH was adjusted to 7. Since the  
291 conjugate base is more hydrophilic than the monoprotic acid, it is less membrane soluble and  
292 hence less toxic.

293 ***Energy density.*** For biotechnological applications, energy density is one of the important  
294 physical properties. The longer the carbon chains become, the higher energy densities the  
295 metabolites contain (Supplementary Figure 5A). Among the classes of metabolites investigated  
296 in this study, alcohols have the highest energy densities followed by esters then acids with the

297 same chain lengths because alcohols are least oxygenated. Therefore, molecules with higher  
298 energy densities are more toxic to microbial growth.

299 ***Hydrophobicity.*** To better capture toxic effects of metabolites within and across different  
300 classes of metabolites, we further examined metabolite hydrophobicity as a basis. We used  
301 partition coefficients to determine and quantitatively compare hydrophobicity of metabolites. As  
302 expected, there is a strong linear correlation between the carbon chain lengths and partition  
303 coefficients ( $R^2 \sim 0.98$ ) (Supplementary Figure 5B). The longer the carbon chain, the higher the  
304 partition coefficient becomes with a strong linear correlation. For the same carbon chain,  
305 chemicals may have slight differences in partition coefficients depending on associated function  
306 groups and chain branching. For instance, partition coefficients of pentanol, isopentanol,  
307 pentanoic acid, isopentanoic acid, ethyl propionate, and propyl acetate are 29.5, 15.1, 21.9, 16.2,  
308 20.9, and 19.1, respectively.

309 Regardless of metabolite types and concentrations, a correlation exists between  
310 hydrophobicity of a metabolite and its toxic effect on microbial growth (Figure 8). As partition  
311 coefficients increase, negative effects on specific growth rates and ODs also increase  
312 significantly. The negative effects become severe when cells are exposed to higher chemical  
313 concentrations. Among different classes of metabolites examined in this study, alcohols are the  
314 most toxic as compared to acids and esters at the same partition coefficients and concentrations.  
315 Esters also appear to be less toxic than acids at lower partition coefficients and chemical  
316 concentrations. All compounds that prevented growth at concentrations greater than 2.5 g/L have  
317 a partition coefficient at least ~250 times greater than ethanol. Every branched chain isomer in  
318 this work was shown to be less toxic than the associated straight chain isomer, and in each case  
319 the branched chain has a lower partition coefficient than the straight chain compound.

320 Hydrophobicity of a metabolite and its toxic effect on microbial growth can be similarly  
321 explained by hydrophobic interaction between the metabolite and cell membrane. As partition  
322 coefficients increase, metabolites become more membrane soluble and disrupt lipid membranes,  
323 which enhance degrees of toxicity and sufficiently alter cell morphology [44-46]. Therefore,  
324 hydrophobicity is a good quantitative index to evaluate toxic effect of a metabolite on microbial  
325 health.

326

## 327 **CONCLUSION**

328 Analysis of a comprehensive list short-chain alcohols, acids, and esters shows distinctive  
329 toxic effects of these metabolites on *E. coli* health. Alcohols are most toxic followed by acids  
330 and esters at identical concentrations and total carbon counts. Regardless of metabolite classes  
331 and concentrations, longer-chain metabolites inhibit microbial growth more significantly than  
332 shorter-chain ones. Branched-chain metabolites are less toxic than straight-chain ones with same  
333 total carbon count. Remarkably, for the same total carbon counts, esters having longer-chain  
334 alcohol moieties are more inhibitory than those having short-chain alcohol moieties.  
335 Hydrophobicity of a metabolite is a good quantitative index to determine its toxic effect on  
336 microbial health. Since this study focuses on characterizing toxic effects of fermentative  
337 metabolites on an industrial workhorse gram-negative bacterium *E. coli*, it is of particular  
338 interest to further explore in the future whether the trends found in this study exist in other  
339 bacterial, eukaryotic, and archaeal species. Even though it is not the focus of this study,  
340 fermentative metabolites can cause cytotoxicity when they are present inside the cells [23, 24,  
341 47]. Overall, the results of this study shed light on toxic effects of fermentative metabolites with



342 distinct characteristics on microbial growth as wells as help selection of desirable metabolites  
343 and hosts for industrial fermentation to overproduce them.

344

## 345 **MATERIALS AND METHODS**

### 346 **Medium and cell culturing**

347 For all *E. coli* MG1655 (DE3) characterization experiments, modified M9 medium  
348 (pH~7) was used, consisting of 100 mL/L of 10X M9 salts, 1 ml/L of 1 M MgSO<sub>4</sub>, 100 µL/L of  
349 1M CaCl<sub>2</sub>, 1 ml/L of stock thiamine HCl solution (1 g/L), 1 ml/L of stock trace metals solution,  
350 10 g/L glucose, and 5 g/L yeast extract [48]. 10X M9 salts are composed 70 g/L Na<sub>2</sub>HPO<sub>4</sub>•H<sub>2</sub>O,  
351 30 g/L KH<sub>2</sub>PO<sub>4</sub>, 5 g/L NaCl, and 10 g/L NH<sub>4</sub>Cl. Alcohols, esters, and acids were added at  
352 necessary concentrations into flasks of partitioned media. Media with the chemical of interest  
353 was then transferred from these flasks to 28 mL balch tubes and capped with rubber stoppers and  
354 aluminum seals. After addition of each chemical, media were pH adjusted to 6.5-7 with 5M  
355 KOH. Alcohols, acids, and esters were studied at varying concentrations based on a combination  
356 of factors including solubility and observed toxicity.

357 Stock cells from the -80°C freezer were struck onto lysogeny broth (LB)-agar plates and  
358 then were grown overnight in flasks containing 50 mL of the modified M9 medium in a New  
359 Brunswick Excella E25 incubator at 37°C and 175 rpm until OD<sub>600nm</sub> (optical density measured  
360 at 600 nm using a Thermo Scientific Genysys 30 Visible Spectrophotometer) reached 2.5-3.0. In  
361 the event that this OD setpoint was surpassed, cells were diluted in 50 mL of the same medium  
362 to OD = 1.0 and grown once again to OD = 2.5. Cells were transferred to nitrogen sparged,  
363 anaerobic culture balch tubes containing 20 mL of media at initial OD = 0.1 to begin growth

364 characterization on a 75° angled platform under identical conditions. All experiments were  
365 performed in at least 3 biological replicates.

366

## 367 **Data collection and analysis**

368 **Partition coefficient.** Partition coefficient, a measure of hydrophobicity of a metabolite,  
369 is calculated as follows:

$$370 \quad \log_{10} P_i = \log_{10} \left( \frac{S_i^{\text{octanol}}}{S_i^{\text{water}}} \right) \quad [1]$$

371 where  $P_i$  is the partition coefficient of metabolite  $i$ ;  $S_i^{\text{octanol}}$  and  $S_i^{\text{water}}$  (g/L) are the solubilities of  
372 metabolite  $i$  in octanol and water, respectively.  $P_i$  is calculated using the Molinspiration  
373 Cheminformatics interactive log(P) calculator [49]. The input for this calculator uses the  
374 SMILES chemical notation acquired from PubChem [50].

375 **ONMED.** Octane Normalized Mass Energy Density (ONMED) is calculated as a ratio of  
376 standard heat of combustion of a metabolite to that of octane (~44.5 kJ/kg) [18] where the standard  
377 heat of combustion of each chemical was estimated based on average bond energies [51].

378 **Specific growth rate.** First-order kinetics is applied to calculate a specific growth rate  
379 from kinetic measurement of cell growth as follows:

$$380 \quad \mu = \frac{1}{C_X} \cdot \frac{dC_X}{dt} \quad [2]$$

381 where  $\mu$  (1/h) is the specific growth rate,  $C_X$  (g/L) is cell titer, and  $t$  (h) is culturing time. Note  
382 that in our study cell titer is estimated from measured OD with a correlation of 1 OD ~ 0.5 g  
383 DCW/L.

384

## 385 **ABBREVIATIONS**

386  $\mu$ : specific growth rate;  $C_X$ : cell concentration; DCW: dry cell weight; OD: optical  
387 density; ONMED: octane normalized mass energy density;  $P_i$ : partition coefficient  
388 of metabolite  $i$ ;  $S_i^{\text{octanol}}$  and  $S_i^{\text{water}}$ : solubilities of metabolite  $i$  in octanol and water,  
389 respectively;  $t$ : time;  $h$ : hour.

390

## 391 **ETHICAL APPROVAL AND CONSENT TO PARTICIPATE**

392 Not applicable.

393

## 394 **CONSENT FOR PUBLICATION**

395 The authors consent for publication

396

## 397 **AVAILABILITY OF SUPPORTING DATA**

398 Not applicable.

399

## 400 **COMPETING INTERESTS**

401 The authors declare no competing interests.

402

## 403 **FUNDING**

404 This research was financially supported in part by the NSF CAREER award (NSF#1553250) and  
405 the DOE subcontract grant (DE-AC05-000R22725) by the BioEnergy Science Center (BESC),

406 the U.S. Department of Energy Bioenergy Research Center funded by the Office of Biological  
407 and Environmental Research in the DOE Office of Science.

408

#### 409 **AUTHOR'S CONTRIBUTIONS**

410 CTT conceived and supervised the study. CTT and BW designed experiments, analyzed the data,  
411 and drafted the manuscript. BW performed the experiments. The authors have read and approved  
412 the manuscript.

413

#### 414 **ACKNOWLEDGEMENT**

415 We would like to thank Dr. Seunghyun Ryu for proofreading the manuscript and providing  
416 comments.

417

## 418 REFERENCES

- 419 1. Smith PM, Howitt MR, Panikov N, Michaud M, Gallini CA, Bohlooly-y M, Glickman  
420 JN, Garrett WS: **The microbial metabolites, short-chain fatty acids, regulate colonic**  
421 **Treg cell homeostasis.** *Science* 2013, **341**(6145):569-573.
- 422 2. Agler MT, Wrenn BA, Zinder SH, Angenent LT: **Waste to bioproduct conversion with**  
423 **undefined mixed cultures: the carboxylate platform.** *Trends in biotechnology* 2011,  
424 **29**(2):70-78.
- 425 3. Ingram L, Conway T, Clark D, Sewell G, Preston J: **Genetic engineering of ethanol**  
426 **production in *Escherichia coli*.** *Appl Environ Microbiol* 1987, **53**(10):2420 - 2425.
- 427 4. Trinh C, Srien F: **Metabolic engineering of *Escherichia coli* for efficient conversion**  
428 **of glycerol to ethanol.** *Appl Environ Microbiol* 2009, **75**(21):6696 - 6705.
- 429 5. Hanai T, Atsumi S, Liao J: **Engineered synthetic pathway for isopropanol production**  
430 **in *Escherichia coli*.** *Applied and Environmental Microbiology* 2007, **73**(24):7814-7818.
- 431 6. Inui M: **Expression of *Clostridium acetobutylicum* butanol synthetic genes in**  
432 ***Escherichia coli*.** *Appl Microbiol Biotechnol* 2008, **77**(6):1305 - 1316.
- 433 7. Atsumi S, Hanai T, Liao JC: **Non-fermentative pathways for synthesis of branched-**  
434 **chain higher alcohols as biofuels.** *Nature* 2008, **451**(7174):86-89.
- 435 8. Tseng H-C, Prather KL: **Controlled biosynthesis of odd-chain fuels and chemicals via**  
436 **engineered modular metabolic pathways.** *Proceedings of the National Academy of*  
437 *Sciences* 2012, **109**(44):17925-17930.
- 438 9. Dekishima Y, Lan EI, Shen CR, Cho KM, Liao JC: **Extending carbon chain length of**  
439 **1-butanol pathway for 1-hexanol synthesis from glucose by engineered *Escherichia***  
440 ***coli*.** *Journal of the American Chemical Society* 2011, **133**(30):11399-11401.

- 441 10. Nakamura CE, Whited GM: **Metabolic engineering for the microbial production of**  
442 **1,3-propanediol**. *Current opinion in biotechnology* 2003, **14**(5):454-459.
- 443 11. Yim H, Haselbeck R, Niu W, Pujol-Baxley C, Burgard A, Boldt J, Khandurina J,  
444 Trawick JD, Osterhout RE, Stephen R: **Metabolic engineering of *Escherichia coli* for**  
445 **direct production of 1, 4-butanediol**. *Nature chemical biology* 2011, **7**(7):445-452.
- 446 12. Causey T, Shanmugam K, Yomano L, Ingram L: **Engineering *Escherichia coli* for**  
447 **efficient conversion of glucose to pyruvate**. *Proceedings of the National Academy of*  
448 *Sciences of the United States of America* 2004, **101**(8):2235-2240.
- 449 13. Chang D-E, Jung H-C, Rhee J-S, Pan J-G: **Homofermentative production of d-ori-**  
450 **lactate in metabolically engineered *Escherichia coli* RR1**. *Applied and Environmental*  
451 *Microbiology* 1999, **65**(4):1384-1389.
- 452 14. Torella JP, Ford TJ, Kim SN, Chen AM, Way JC, Silver PA: **Tailored fatty acid**  
453 **synthesis via dynamic control of fatty acid elongation**. *Proceedings of the National*  
454 *Academy of Sciences* 2013, **110**(28):11290-11295.
- 455 15. Sánchez AM, Bennett GN, San K-Y: **Novel pathway engineering design of the**  
456 **anaerobic central metabolic pathway in *Escherichia coli* to increase succinate yield**  
457 **and productivity**. *Metabolic engineering* 2005, **7**(3):229-239.
- 458 16. Yu JL, Xia XX, Zhong JJ, Qian ZG: **Direct biosynthesis of adipic acid from a**  
459 **synthetic pathway in recombinant *Escherichia coli***. *Biotechnology and bioengineering*  
460 2014, **111**(12):2580-2586.
- 461 17. Rodriguez GM, Tashiro Y, Atsumi S: **Expanding ester biosynthesis in *Escherichia***  
462 ***coli***. *Nature chemical biology* 2014, **10**(4):259-265.

- 463 18. Layton DS, Trinh CT: **Microbial synthesis of a branched-chain ester platform from**  
464 **organic waste carboxylates.** *Metabolic Engineering Communications* 2016, **3**:245-251.
- 465 19. Layton DS, Trinh CT: **Expanding the modular ester fermentative pathways for**  
466 **combinatorial biosynthesis of esters from volatile organic acids.** *Biotechnology and*  
467 *bioengineering* 2016.
- 468 20. Layton DS, Trinh CT: **Engineering modular ester fermentative pathways in**  
469 ***Escherichia coli*.** *Metabolic engineering* 2014, **26**:77-88.
- 470 21. Warnecke T, Gill RT: **Organic acid toxicity, tolerance, and production in *Escherichia***  
471 ***coli* biorefining applications.** *Microbial Cell Factories* 2005, **4**(1):25.
- 472 22. Jarboe LR, Royce LA, Liu P: **Understanding biocatalyst inhibition by carboxylic**  
473 **acids.** *Frontiers in microbiology* 2013, **4**.
- 474 23. Brynildsen MP, Liao JC: **An integrated network approach identifies the isobutanol**  
475 **response network of *Escherichia coli*.** *Molecular Systems Biology* 2009,  
476 **5**(1).
- 477 24. Atsumi S, Wu TY, Machado IM, Huang WC, Chen PY, Pellegrini M, Liao JC:  
478 **Evolution, genomic analysis, and reconstruction of isobutanol tolerance in**  
479 ***Escherichia coli*.** *Molecular systems biology* 2010, **6**(1):449.
- 480 25. Huffer S, Clark ME, Ning JC, Blanch HW, Clark DS: **Role of Alcohols in Growth,**  
481 **Lipid Composition, and Membrane Fluidity of Yeasts, Bacteria, and Archaea.**  
482 *Applied and Environmental Microbiology* 2011, **77**(18):6400-6408.
- 483 26. Lennen RM, Kruziki MA, Kumar K, Zinkel RA, Burnum KE, Lipton MS, Hoover SW,  
484 Ranatunga DR, Wittkopp TM, Marner WD *et al*: **Membrane Stresses Induced by**

- 485           **Overproduction of Free Fatty Acids in Escherichia coli.** *Applied and Environmental*  
486           *Microbiology* 2011, **77**(22):8114-8128.
- 487 27. Royce LA, Liu P, Stebbins MJ, Hanson BC, Jarboe LR: **The damaging effects of short**  
488           **chain fatty acids on Escherichia coli membranes.** *Applied Microbiology and*  
489           *Biotechnology* 2013, **97**(18):8317-8327.
- 490 28. Zaldivar J, Ingram LO: **Effect of organic acids on the growth and fermentation of**  
491           **ethanogenic Escherichia coli LY01.** *Biotechnology and bioengineering* 1999,  
492           **66**(4):203-210.
- 493 29. Nicolaou SA, Gaida SM, Papoutsakis ET: **A comparative view of metabolite and**  
494           **substrate stress and tolerance in microbial bioprocessing: from biofuels and**  
495           **chemicals, to biocatalysis and bioremediation.** *Metabolic engineering* 2010, **12**(4):307-  
496           331.
- 497 30. Lennen RM, Pfleger BF: **Modulating membrane composition alters free fatty acid**  
498           **tolerance in Escherichia coli.** *PLoS One* 2013, **8**(1):e54031.
- 499 31. Sherkhanov S, Korman TP, Bowie JU: **Improving the tolerance of Escherichia coli to**  
500           **medium-chain fatty acid production.** *Metabolic engineering* 2014, **25**:1-7.
- 501 32. Tan Z, Yoon JM, Nielsen DR, Shanks JV, Jarboe LR: **Membrane engineering via trans**  
502           **unsaturated fatty acids production improves Escherichia coli robustness and**  
503           **production of biorenewables.** *Metabolic engineering* 2016, **35**:105-113.
- 504 33. Dunlop MJ, Dossani ZY, Szmids HL, Chu HC, Lee TS, Keasling JD, Hadi MZ,  
505           Mukhopadhyay A: **Engineering microbial biofuel tolerance and export using efflux**  
506           **pumps.** *Molecular systems biology* 2011, **7**(1):487.



- 507 34. Zingaro KA, Papoutsakis ET: **GroESL overexpression imparts Escherichia coli**  
508 **tolerance to i-, n-, and 2-butanol, 1, 2, 4-butanetriol and ethanol with complex and**  
509 **unpredictable patterns.** *Metabolic engineering* 2013, **15**:196-205.
- 510 35. Trček J, Mira NP, Jarboe LR: **Adaptation and tolerance of bacteria against acetic**  
511 **acid.** *Applied microbiology and biotechnology* 2015, **99**(15):6215-6229.
- 512 36. Woodruff LB, Boyle NR, Gill RT: **Engineering improved ethanol production in**  
513 **Escherichia coli with a genome-wide approach.** *Metabolic engineering* 2013, **17**:1-11.
- 514 37. Sandoval NR, Kim JY, Glebes TY, Reeder PJ, Aucoin HR, Warner JR, Gill RT: **Strategy**  
515 **for directing combinatorial genome engineering in Escherichia coli.** *Proceedings of*  
516 *the National Academy of Sciences* 2012, **109**(26):10540-10545.
- 517 38. Knoshaug EP, Zhang M: **Butanol tolerance in a selection of microorganisms.** *Applied*  
518 *Biochemistry and Biotechnology* 2009, **153**(1-3):13-20.
- 519 39. Alakomi H-L, Skyttä E, Saarela M, Mattila-Sandholm T, Latva-Kala K, Helander I:  
520 **Lactic acid permeabilizes gram-negative bacteria by disrupting the outer**  
521 **membrane.** *Applied and environmental microbiology* 2000, **66**(5):2001-2005.
- 522 40. DiRienzo JM, Inouye M: **Lipid fluidity-dependent biosynthesis and assembly of the**  
523 **outer membrane proteins of E. coli.** *Cell* 1979, **17**(1):155-161.
- 524 41. Dombek KM, Ingram L: **Effects of ethanol on the Escherichia coli plasma membrane.**  
525 *Journal of bacteriology* 1984, **157**(1):233-239.
- 526 42. Cho C-W, Pham TPT, Jeon Y-C, Vijayaraghavan K, Choe W-S, Yun Y-S: **Toxicity of**  
527 **imidazolium salt with anion bromide to a phytoplankton Selenastrum**  
528 **capricornutum: effect of alkyl-chain length.** *Chemosphere* 2007, **69**(6):1003-1007.

- 529 43. Garcia M, Campos E, Sanchez-Leal J, Ribosa I: **Effect of the alkyl chain length on the**  
530 **anaerobic biodegradability and toxicity of quaternary ammonium based**  
531 **surfactants.** *Chemosphere* 1999, **38**(15):3473-3483.
- 532 44. Wong P, Chau Y, Kramar O, Bengert G: **Structure–toxicity relationship of tin**  
533 **compounds on algae.** *Canadian Journal of Fisheries and Aquatic Sciences* 1982,  
534 **39**(3):483-488.
- 535 45. Sikkema J, De Bont J, Poolman B: **Interactions of cyclic hydrocarbons with biological**  
536 **membranes.** *Journal of Biological Chemistry* 1994, **269**(11):8022-8028.
- 537 46. Sikkema J, De Bont J, Poolman B: **Mechanisms of membrane toxicity of**  
538 **hydrocarbons.** *Microbiological reviews* 1995, **59**(2):201-222.
- 539 47. Royce LA, Boggess E, Fu Y, Liu P, Shanks JV, Dickerson J, Jarboe LR: **Transcriptomic**  
540 **Analysis of Carboxylic Acid Challenge in Escherichia coli: Beyond Membrane**  
541 **Damage.** *PLOS ONE* 2014, **9**(2):e89580.
- 542 48. Trinh CT, Li J, Blanch HW, Clark DS: **Redesigning Escherichia coli metabolism for**  
543 **anaerobic production of isobutanol.** *Applied and environmental microbiology* 2011,  
544 **77**(14):4894-4904.
- 545 49. Mannhold R, Poda GI, Ostermann C, Tetko IV: **Calculation of molecular lipophilicity:**  
546 **state-of-the-art and comparison of log P methods on more than 96,000 compounds.**  
547 *Journal of pharmaceutical sciences* 2009, **98**(3):861-893.
- 548 50. Acland A, Agarwala R, Barrett T, Beck J, Benson DA, Bollin C, Bolton E, Bryant SH,  
549 Canese K, Church DM: **Database resources of the national center for biotechnology**  
550 **information.** *Nucleic acids research* 2014, **42**(Database issue):D7.
- 551 51. Zumdahl S, Zumdahl S, DeCoste S: **Chemistry**, 5th edn. Boston: Houghton Mifflin; 2000.

## 552 **FIGURE LEGENDS**

553 **Figure 1:** Growth kinetics of *E. coli* exposed to eight short-chain alcohols at various  
554 concentrations including (A) ethanol, (B) propanol, (C) isopropanol, (D) butanol, (E) isobutanol,  
555 (F) pentanol, (G) isopentanol, and (H) hexanol.

556 **Figure 2:** Comprehensive analysis of toxic effects of alcohols on *E. coli* health based on (A)  
557 specific growth rate and (B) OD.

558 **Figure 3:** Growth kinetics of *E. coli* exposed to eight short-chain fatty acids at various  
559 concentrations including (A) acetic acid, (B) propanoic acid, (C) butanoic acid, (D) isobutanoic  
560 acid, (E) pentanoic acid, (F) isopentanoic acid, (G) hexanoic aid, and (H) octanoic acid.

561 **Figure 4:** Comprehensive analysis of toxic effects of alcohols on *E. coli* health based on (A)  
562 specific growth rate and (B) OD.

563 **Figure 5:** Growth kinetics of *E. coli* exposed to sixteen short-chain esters at various  
564 concentrations including (A-D) ethyl esters, (E-J) (iso)propyl esters, and (K-P) (iso)butyl esters

565 **Figure 6:** Comprehensive analysis of toxic effects of esters on *E. coli* health based on specific  
566 growth rate and OD of (A-B) ethyl esters, (C-D) (iso)propyl esters, and (E-F) (iso)butyl esters.

567 **Figure 7:** Comprehensive analysis of metabolite carbon chains determining toxic effects on *E.*  
568 *coli* health based on (A-C) specific growth rate and (D-F) OD at 2.5, 5.0, and 7.5 g/L  
569 metabolites.

570 **Figure 8:** Comprehensive analysis of degrees of metabolite hydrophobicity determining toxic  
571 effects on *E. coli* health based on (A-C) specific growth rate and (D-F) OD at 2.5, 5.0, and 7.5  
572 g/L metabolites.

573 **SUPPLEMENTARY FILES**

574

575 **Supplementary File S1:** Supplementary Figures and descriptions in a PDF.

576

577 **FIGURE 1**

578

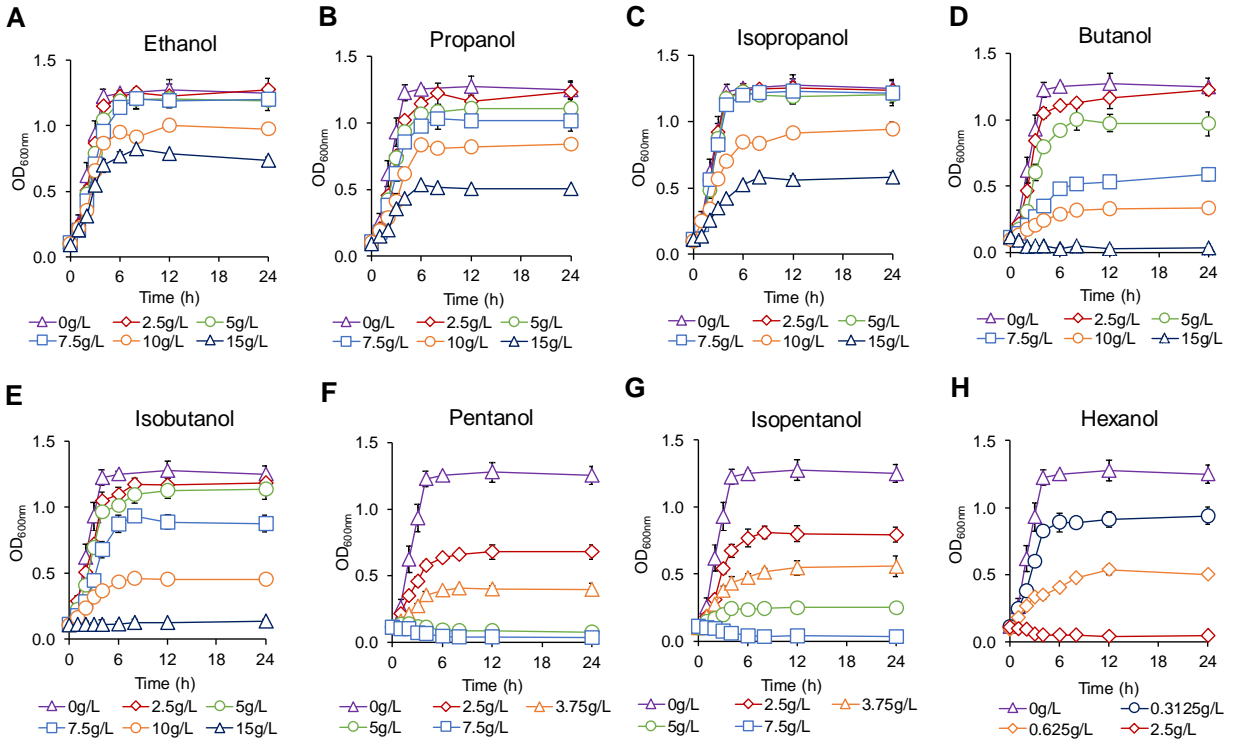

579

580

581 **FIGURE 2**

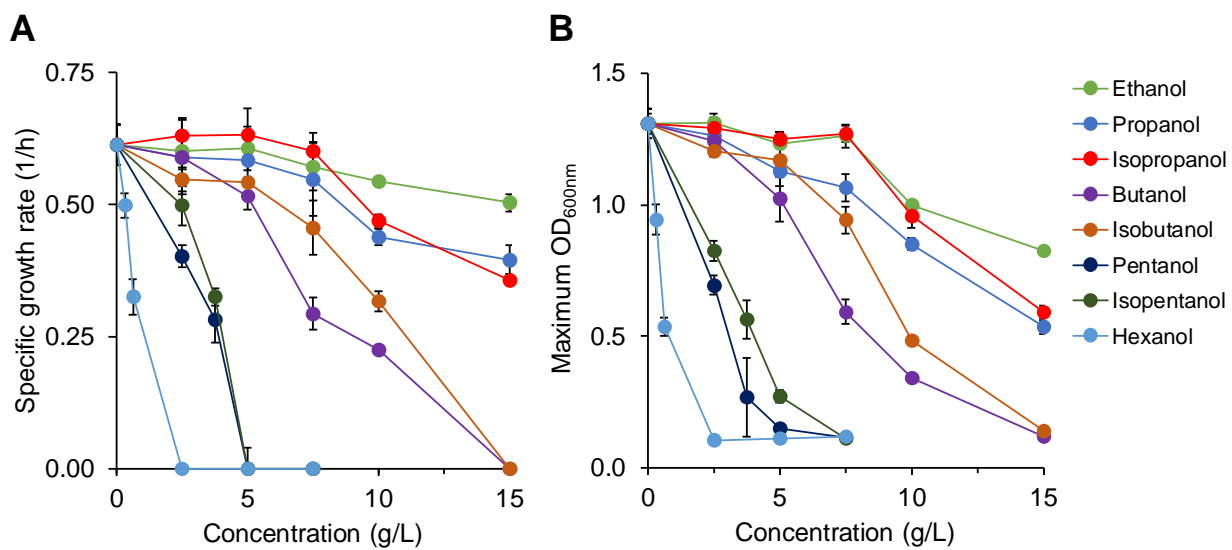

582

583

584

585 **FIGURE 3**

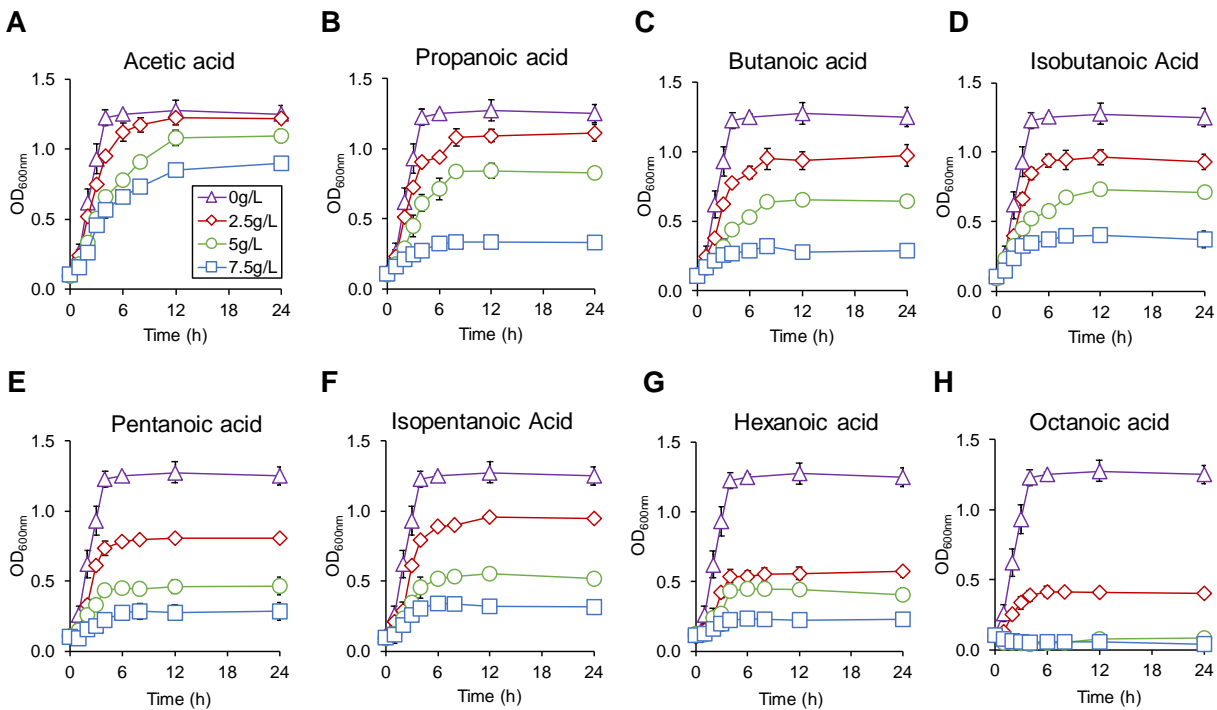

586

587

588 **FIGURE 4**

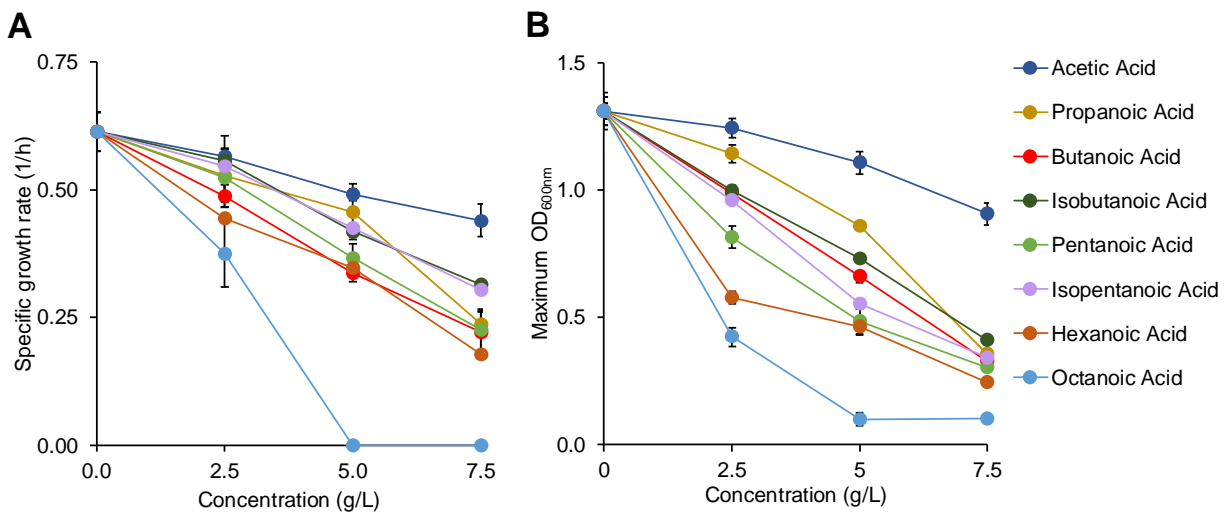

589

590

591



592 **FIGURE 5**

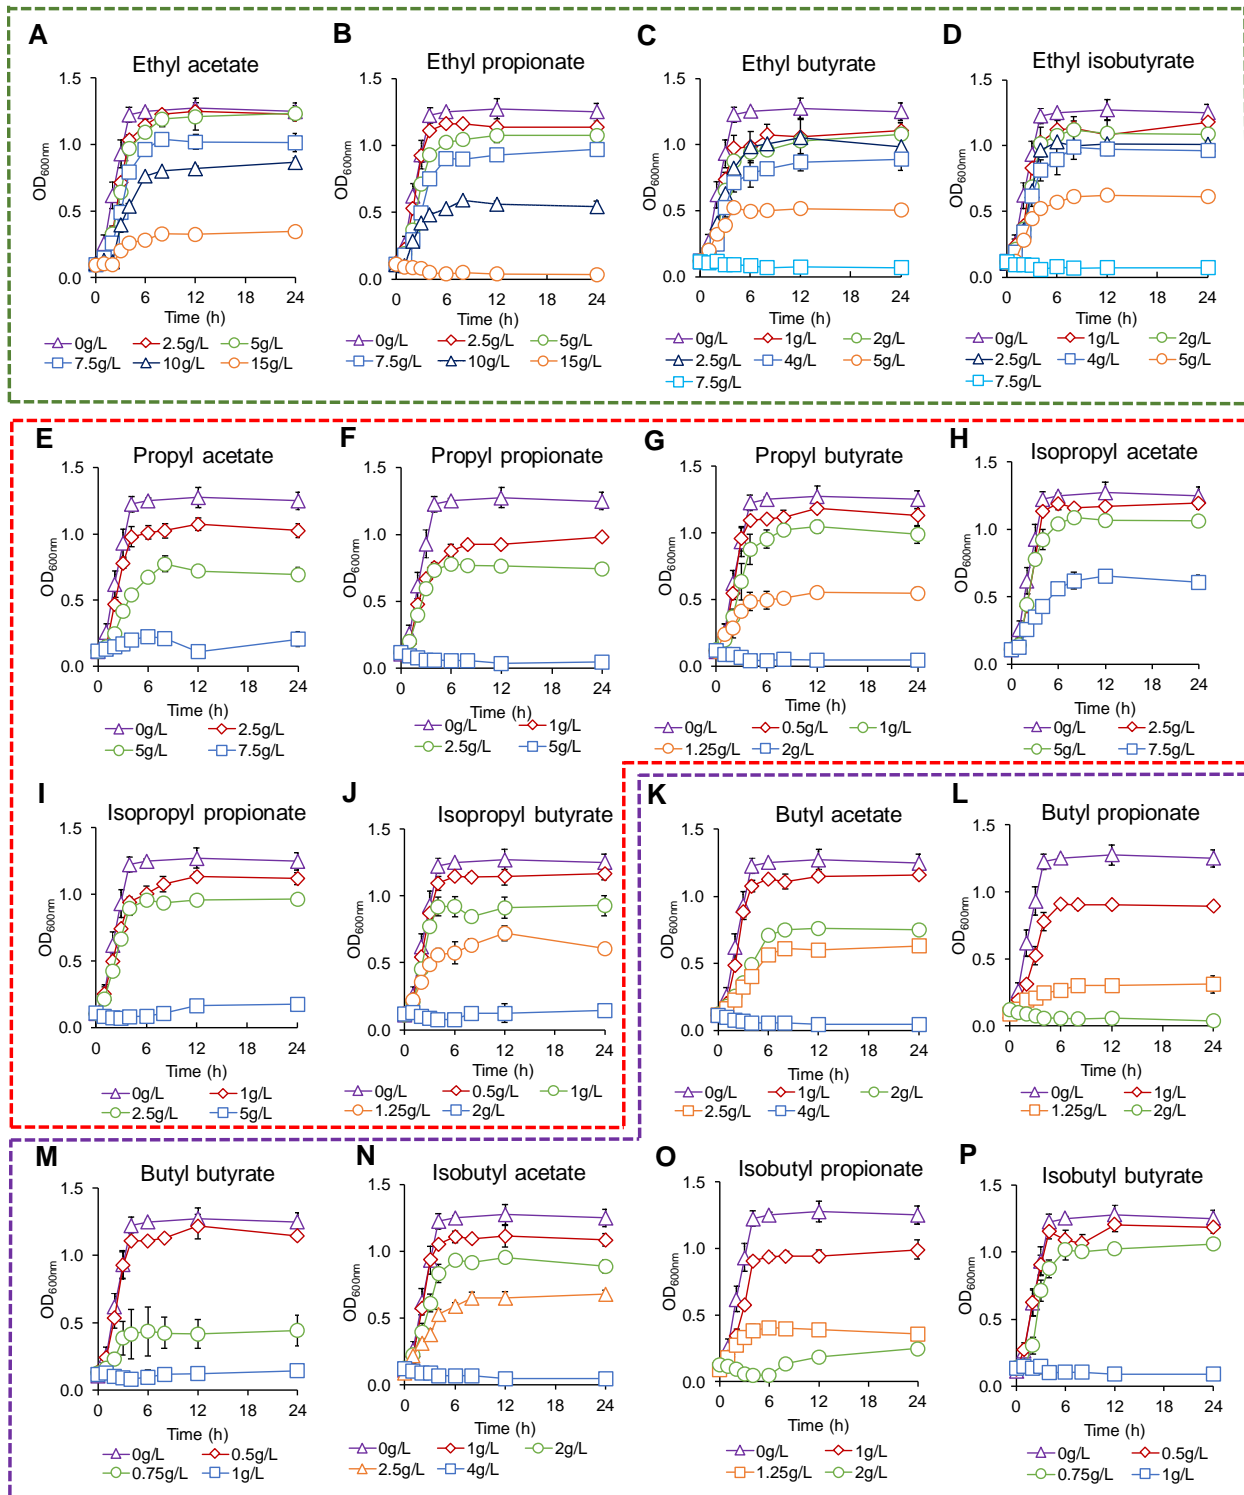

593

594

595 **FIGURE 6**

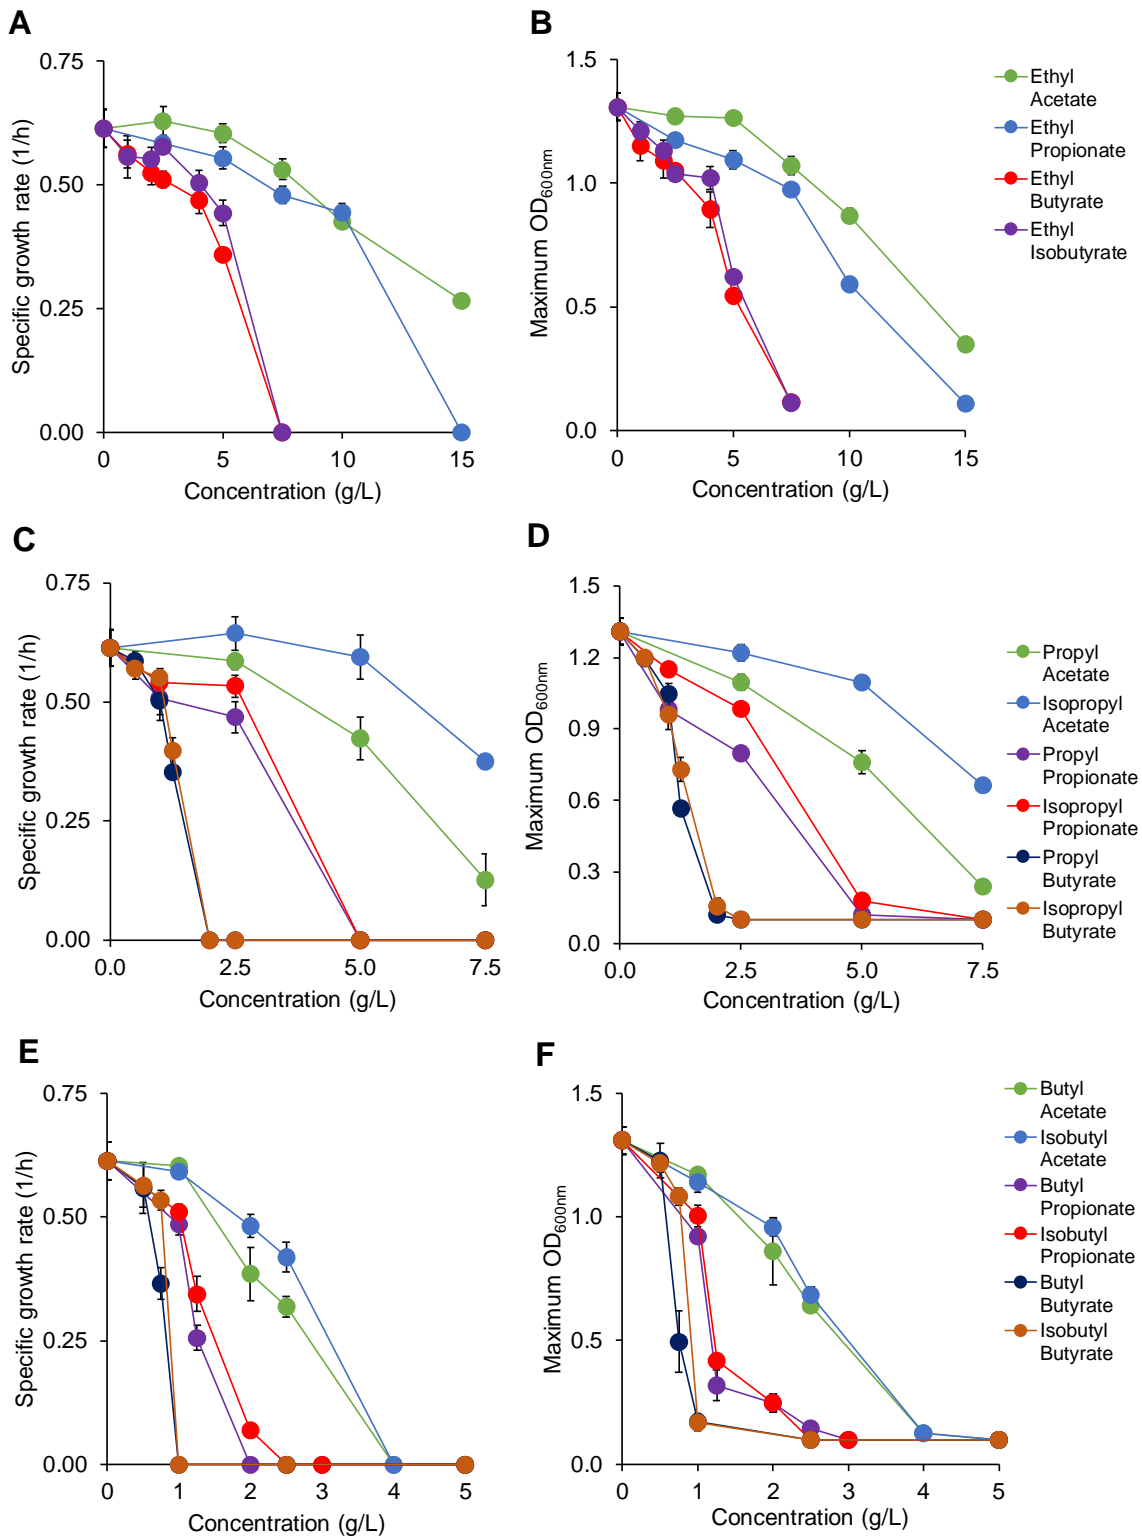

596

597 **FIGURE 7**

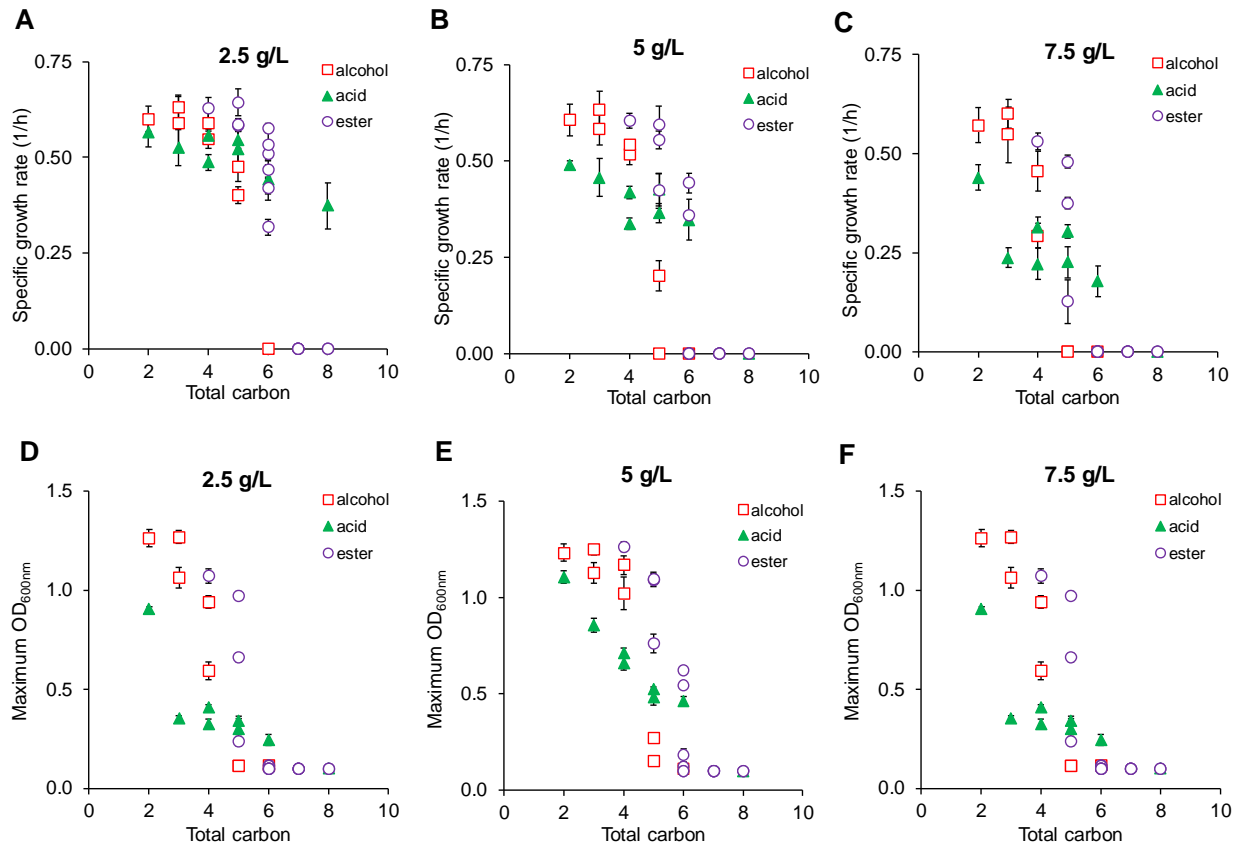

598

599

600 **FIGURE 8**

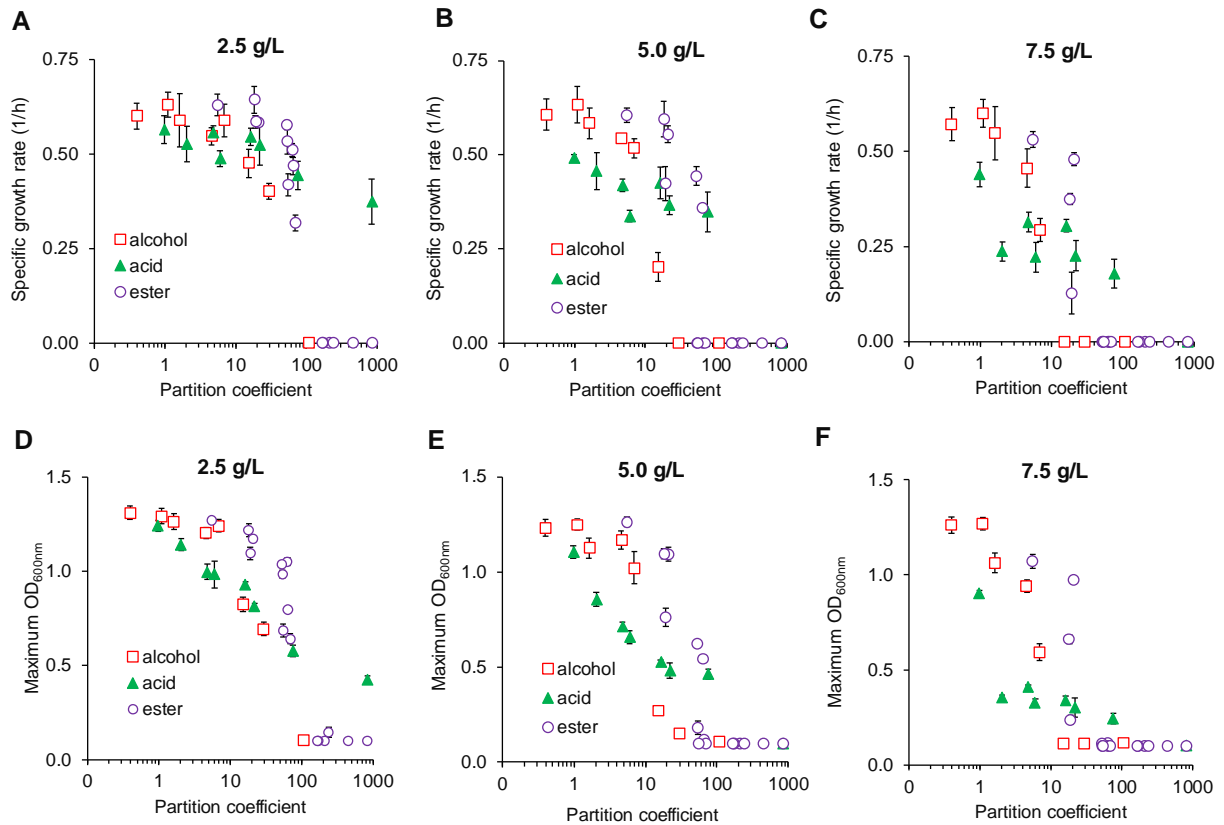

601
